# Supplementary material for: Structural and zeolitic features of a series of heterometallic supramolecular porous architectures based on tetrahedral {M(C2O4)4}4– primary building units
Source: Royal Society of Chemistry journal article supplement (doi:10.1039/b503964a), 2005-01-01
Supplement: b503964a.pdf [file b503964a.pdf]

# Structural and zeolitic features of a series of heterometallic supramolecular porous architectures based on tetrahedral $\{M(C_2O_4)_4\}^{4-}$ primary building units.

Inhar Imaz,<sup>a</sup> Georges Bravic<sup>a</sup> and Jean-Pascal Sutter<sup>a,b,\*</sup>

<sup>a</sup> *Institut de Chimie de la Matière Condensée de Bordeaux – CNRS, Université Bordeaux I, 87 Avenue du Dr. Schweitzer, F-33608 Pessac (France).*

<sup>b</sup> *Laboratoire de Chimie de Coordination du CNRS, Université Toulouse 3, 205 Route de Narbonne, F-31077 Toulouse (France)*

\* e-mail: sutter@lcc-toulouse.fr

## Supplementary Information

**Figure SI1.** Thermogravimetric analysis for  $[K_2MnU(C_2O_4)_4] \cdot 9H_2O$ , **SPA-1**.

**Figure SI2.** Thermogravimetric analysis for  $[K_2CdU(C_2O_4)_4] \cdot 9H_2O$ , **SPA-2**.

**Figure SI3.** Temperature dependences of the X-ray powder diffractograms recorded for  $[K_2MnU(C_2O_4)_4] \cdot 9H_2O$ , **SPA-1** and  $[K_2Mg_2U_2(C_2O_4)_7] \cdot 11H_2O$ , **SPA-3**.

**Figure SI4.** Thermogravimetric analysis for EtOH@**SPA-3**.

**Table SI1.** Atomic coordinates and equivalent isotropic and anisotropic displacement parameters for  $[K_2CdU(C_2O_4)_4] \cdot 9H_2O$ , **SPA-2**.

**Figure SI4.** ORTEP plot (30% probability level) for the asymmetric unit of  $[K_2CdU(C_2O_4)_4] \cdot 9H_2O$ , **SPA-2**.

**Table SI2.** Bond lengths in Å for  $[K_2CdU(C_2O_4)_4] \cdot 9H_2O$ , **SPA-2**.

**Table SI3.** Angles in ° for  $[K_2CdU(C_2O_4)_4] \cdot 9H_2O$ , **SPA-2**.

**Table SI4.** Atomic coordinates, equivalent isotropic and anisotropic displacement parameters for  $[K_2Mg_2U_2(C_2O_4)_7] \cdot 11H_2O$ , **SPA-3**.

**Figure SI5.** ORTEP plot (30% probability level) for the asymmetric unit of  $[K_2Mg_2U_2(C_2O_4)_7] \cdot 11H_2O$ , **SPA-3**.

**Table SI5.** Distances in Å for  $[K_2Mg_2U_2(C_2O_4)_7] \cdot 11H_2O$ , **SPA-3**.

**Table SI6.** Angles in ° for  $[K_2Mg_2U_2(C_2O_4)_7] \cdot 11H_2O$ , **SPA-3**.

**Table SI7.** Atomic coordinates equivalent isotropic and anisotropic displacement parameters for  $[K_2ZrMn(C_2O_4)_4] \cdot 8H_2O$ , **SPA-4**.

**Figure SI6.** ORTEP plot (30% probability level) for the asymmetric unit of  $[K_2Mn\{Zr(C_2O_4)_4\}] \cdot 8H_2O$ , **SPA-4**.

**Table SI8.** Distances in Å for  $[K_2ZrMn(C_2O_4)_4] \cdot 7H_2O$ , **SPA-4**.

**Table SI9.** Angles in ° for  $[K_2ZrMn(C_2O_4)_4] \cdot 7H_2O$ , **SPA-4**.

Figure S11. Thermogravimetric analysis for  $[K_2MnU(C_2O_4)_4] \cdot 9H_2O$ , SPA-1.

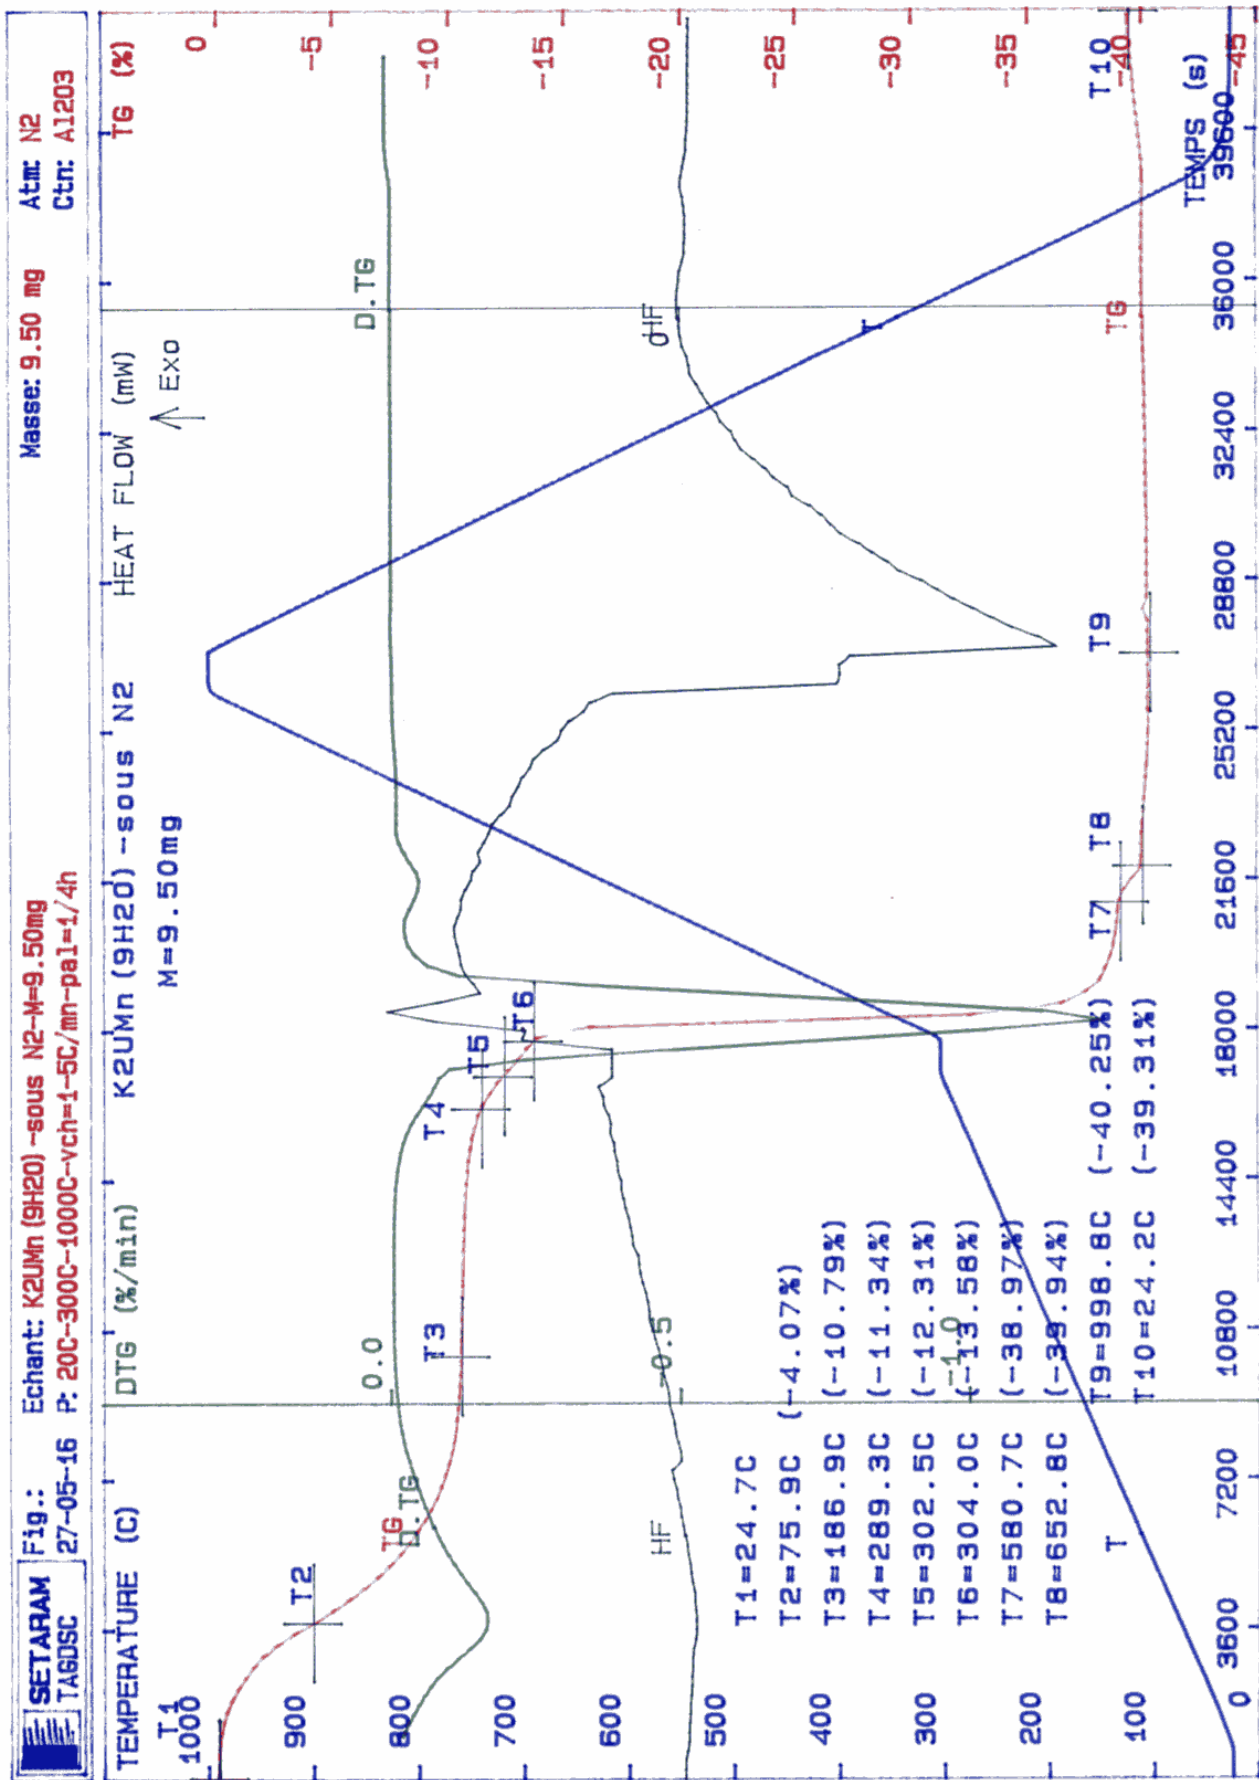

**Figure SI2.** Themogravimetric analysis for  $[\text{K}_2\text{CdU}(\text{C}_2\text{O}_4)_4]\cdot 9\text{H}_2\text{O}$ , SPA-2

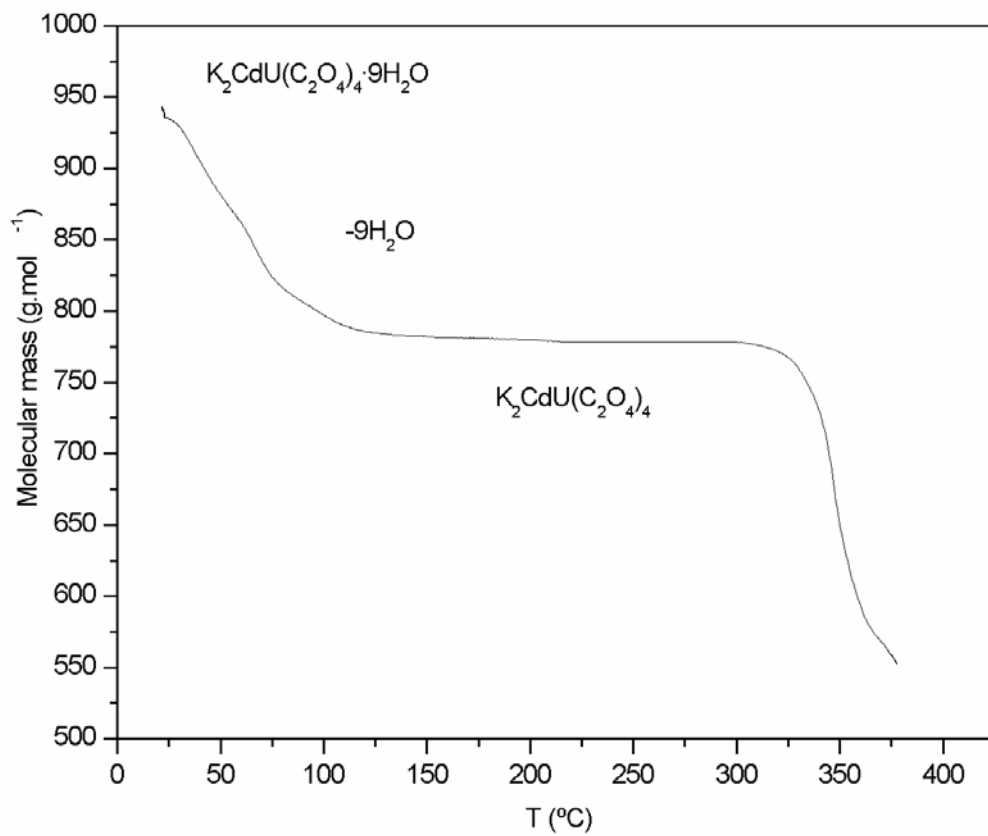

**Figure SI3.** Temperature dependences of the X-ray powder diffractograms recorded for:

a)  $[\text{K}_2\text{MnU}(\text{C}_2\text{O}_4)_4]\cdot 9\text{H}_2\text{O}$ , SPA-1. (\*Pt and \*Al mark the picks due to the sample holder)

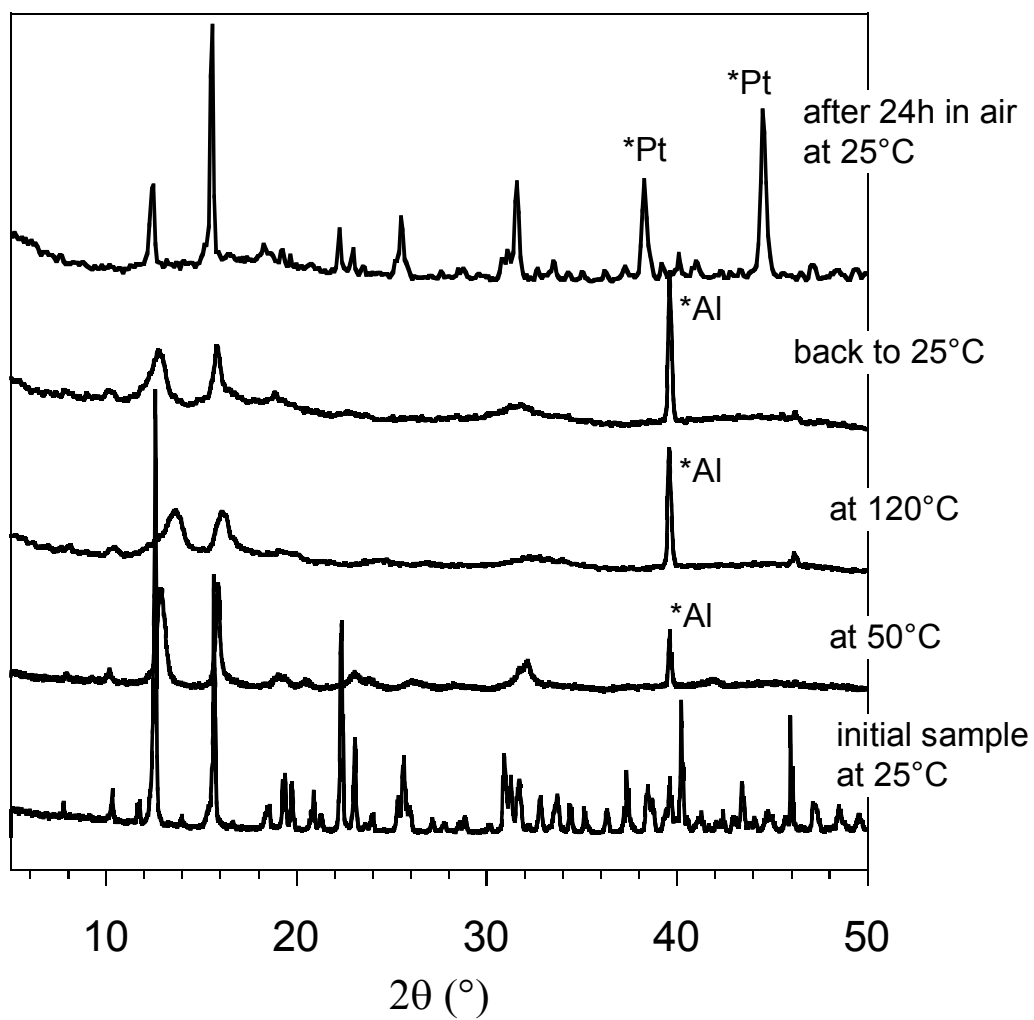

b)  $[\text{K}_2\text{Mg}_2\text{U}_2(\text{C}_2\text{O}_4)_7] \cdot 11\text{H}_2\text{O}$ , SPA-3.

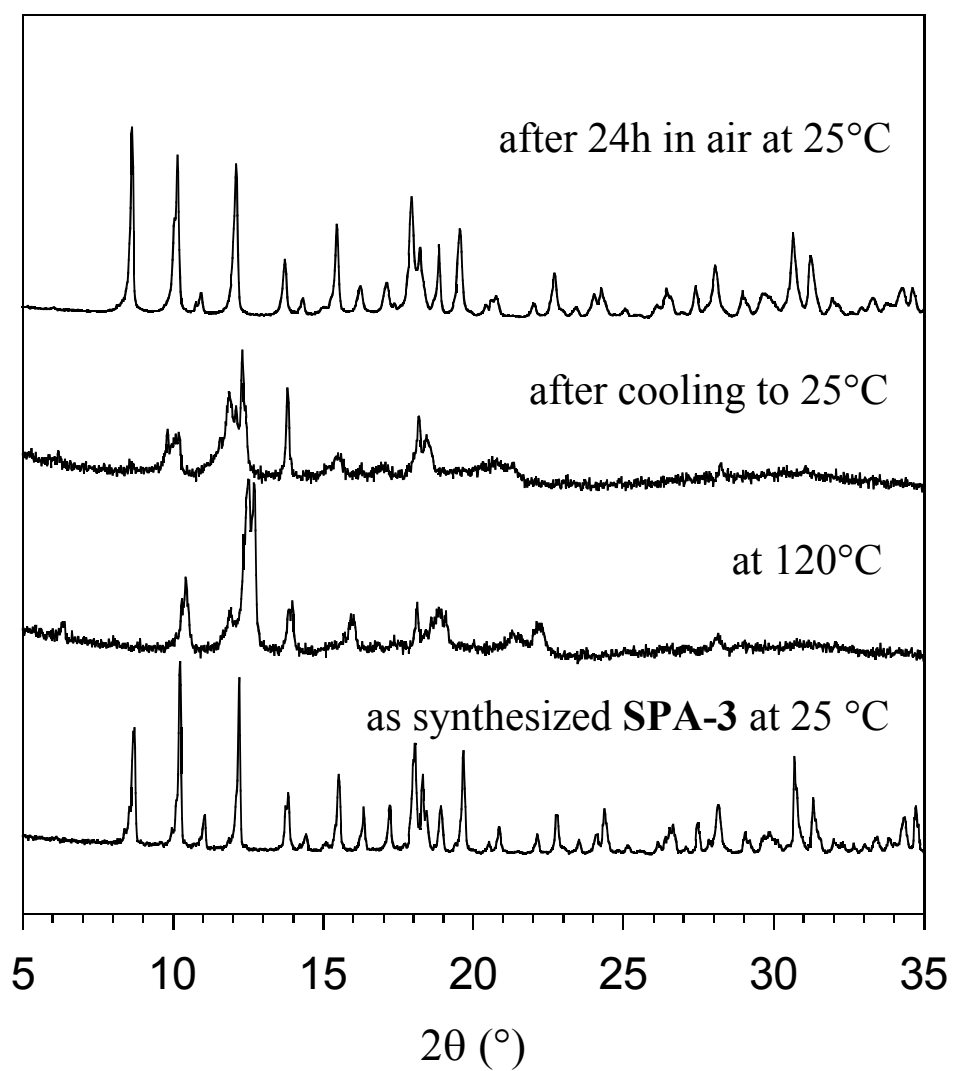

**Figure SI4.** Thermogravimetric analysis for EtOH@SPA-3.

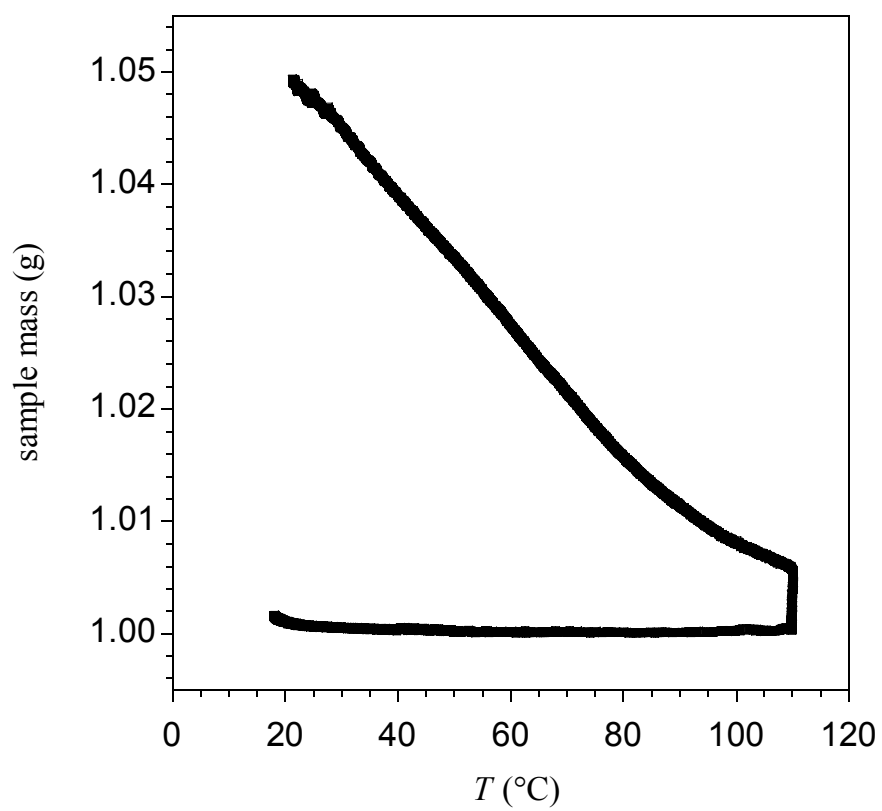

**Table SII(a).** Atomic coordinates and equivalent isotropic displacement parameters for  $[\text{K}_2\text{CdU}(\text{C}_2\text{O}_4)_4]\cdot 9\text{H}_2\text{O}$ , SPA-2.

| Atom | x            | y           | z            | U (eq) [Ang <sup>2</sup> ] |
|------|--------------|-------------|--------------|----------------------------|
| ---- | ---          | ---         | ---          | -----                      |
| U1   | 0.28702 (1)  | 0.76383 (4) | 0.28280 (1)  | 0.0088 (1)                 |
| Cd1  | 0.77568 (4)  | 1.01890 (4) | 0.22672 (4)  | 0.0115 (1)                 |
| K1   | 0.26564 (13) | 0.2708 (3)  | 0.26944 (13) | 0.0279 (4)                 |
| K2   | 0.77802 (16) | 0.5195 (3)  | 0.21895 (16) | 0.0283 (4)                 |
| O1   | 0.5747 (4)   | 1.0839 (5)  | 0.2383 (4)   | 0.0207 (12)                |
| O2   | 0.6509 (4)   | 0.8028 (5)  | 0.1972 (4)   | 0.0213 (14)                |
| O3   | 0.4683 (4)   | 0.7201 (5)  | 0.2048 (4)   | 0.0195 (12)                |
| O4   | 0.4023 (4)   | 0.9858 (5)  | 0.2722 (4)   | 0.0181 (11)                |
| O5   | 0.2406 (4)   | 0.4551 (5)  | 0.5757 (4)   | 0.0222 (14)                |
| O6   | 0.2154 (4)   | 0.7405 (5)  | 0.6517 (4)   | 0.0199 (13)                |
| O7   | 0.2617 (4)   | 0.5462 (5)  | 0.3991 (4)   | 0.0184 (11)                |
| O8   | 0.2380 (4)   | 0.8219 (5)  | 0.4727 (4)   | 0.0164 (11)                |
| O9   | -0.1051 (4)  | 0.7942 (5)  | 0.2407 (5)   | 0.0251 (15)                |
| O10  | -0.0219 (4)  | 1.0760 (5)  | 0.2496 (4)   | 0.0203 (14)                |
| O11  | 0.0810 (4)   | 0.7102 (5)  | 0.2541 (4)   | 0.0197 (13)                |
| O12  | 0.1612 (4)   | 0.9850 (5)  | 0.2651 (4)   | 0.0155 (11)                |
| O13  | 0.2398 (4)   | 0.4596 (5)  | -0.0263 (4)  | 0.0235 (14)                |
| O14  | 0.2191 (4)   | 0.7428 (6)  | -0.1063 (4)  | 0.0226 (13)                |
| O15  | 0.2695 (4)   | 0.5493 (5)  | 0.1567 (4)   | 0.0158 (11)                |
| O16  | 0.2398 (4)   | 0.8235 (5)  | 0.0792 (4)   | 0.0204 (11)                |
| O17  | 0.4653 (4)   | 0.7420 (7)  | 0.4390 (4)   | 0.0291 (16)                |
| O19  | 0.0534 (6)   | 0.3159 (8)  | 0.1159 (7)   | 0.057 (2)                  |
| O20  | 0.3833 (6)   | 0.2290 (7)  | 0.0680 (5)   | 0.049 (2)                  |
| O21  | 0.5060 (5)   | 0.3474 (7)  | 0.3378 (5)   | 0.0387 (17)                |
| O22  | 0.5532 (6)   | 0.4762 (8)  | 0.0835 (7)   | 0.051 (2)                  |
| O23  | 0.9767 (5)   | 0.5115 (8)  | 0.4020 (7)   | 0.050 (2)                  |
| O24  | 0.9033 (6)   | 0.5572 (7)  | 0.0257 (5)   | 0.0460 (19)                |
| O25  | 0.6877 (5)   | 0.6168 (7)  | 0.4366 (6)   | 0.0458 (19)                |
| C1   | 0.5060 (5)   | 0.9788 (7)  | 0.2443 (5)   | 0.0149 (16)                |
| C2   | 0.5469 (5)   | 0.8215 (7)  | 0.2119 (5)   | 0.0141 (16)                |
| C3   | 0.2455 (5)   | 0.5581 (7)  | 0.5057 (5)   | 0.0143 (16)                |
| C4   | 0.2310 (5)   | 0.7209 (6)  | 0.5498 (5)   | 0.0118 (14)                |
| C5   | 0.0504 (5)   | 0.9724 (6)  | 0.2538 (5)   | 0.0134 (16)                |
| C6   | 0.0026 (5)   | 0.8122 (6)  | 0.2480 (5)   | 0.0134 (16)                |
| C7   | 0.2346 (5)   | 0.7231 (6)  | 0.0009 (5)   | 0.0132 (16)                |
| C8   | 0.2484 (5)   | 0.5627 (6)  | 0.0464 (5)   | 0.0129 (16)                |
| O18  | 0.0807 (6)   | 0.2346 (7)  | 0.4457 (6)   | 0.051 (2)                  |
| H17A | 0.53250      | 0.71290     | 0.40300      | 0.0130                     |
| H17B | 0.44980      | 0.66910     | 0.49580      | 0.0130                     |
| H19A | 0.00260      | 0.23150     | 0.11910      | 0.0130                     |
| H19C | 0.01420      | 0.40400     | 0.13940      | 0.0130                     |
| H20B | 0.45150      | 0.29300     | 0.07430      | 0.0130                     |
| H20C | 0.33130      | 0.25510     | -0.00070     | 0.0130                     |
| H21B | 0.51070      | 0.43880     | 0.38130      | 0.0130                     |
| H21C | 0.54480      | 0.35990     | 0.26920      | 0.0130                     |
| H22A | 0.50540      | 0.56200     | 0.09240      | 0.0130                     |
| H22C | 0.56440      | 0.46570     | 0.00260      | 0.0130                     |
| H23A | 0.98110      | 0.60360     | 0.44410      | 0.0130                     |
| H23B | 1.04770      | 0.49720     | 0.36710      | 0.0130                     |
| H24A | 0.92820      | 0.65970     | 0.02270      | 0.0130                     |
| H24B | 0.85230      | 0.53430     | -0.04510     | 0.0130                     |
| H25A | 0.70260      | 0.72160     | 0.44810      | 0.0130                     |
| H25B | 0.72770      | 0.56240     | 0.50180      | 0.0130                     |
| H18B | 0.00320      | 0.24930     | 0.40520      | 0.0130                     |
| H18C | 0.09600      | 0.30740     | 0.50700      | 0.0130                     |

**Table S11(b).** Anisotropic displacement parameters ( $\text{\AA}^2 \times 10^3$ ) for  $\text{K}_2\text{CdU}(\text{C}_2\text{O}_4)_4 \cdot 9\text{H}_2\text{O}$ , **SPA-2**. The anisotropic displacement factor exponent takes the form:  $-2\pi^2 [h^2 a^{*2} U_{11} + \dots + 2hk a^* b^* U_{12}]$

| Atom | U(1,1)     | or U(2,2)  | U(3,3)     | U(2,3)      | U(1,3)      | U(1,2)      |
|------|------------|------------|------------|-------------|-------------|-------------|
| ---- | -----      | -----      | -----      | -----       | -----       | -----       |
| U1   | 0.0084(1)  | 0.0101(1)  | 0.0081(1)  | -0.0002(1)  | 0.0022(1)   | -0.0002(1)  |
| Cd1  | 0.0109(2)  | 0.0135(2)  | 0.0104(2)  | -0.0005(2)  | 0.0022(2)   | -0.0006(2)  |
| K1   | 0.0313(6)  | 0.0166(7)  | 0.0356(7)  | 0.0014(9)   | 0.0038(5)   | -0.0028(10) |
| K2   | 0.0313(8)  | 0.0201(7)  | 0.0330(8)  | -0.0035(8)  | 0.0026(7)   | -0.0014(7)  |
| O1   | 0.012(2)   | 0.017(2)   | 0.033(2)   | -0.0002(19) | 0.0029(18)  | -0.0026(16) |
| O2   | 0.0128(19) | 0.023(3)   | 0.029(2)   | -0.0048(17) | 0.0061(16)  | -0.0005(15) |
| O3   | 0.016(2)   | 0.015(2)   | 0.029(2)   | -0.0092(16) | 0.0091(17)  | -0.0052(15) |
| O4   | 0.0125(19) | 0.015(2)   | 0.028(2)   | -0.0006(17) | 0.0075(17)  | -0.0003(16) |
| O5   | 0.036(3)   | 0.018(2)   | 0.012(2)   | 0.0021(17)  | 0.0010(18)  | -0.0049(19) |
| O6   | 0.028(2)   | 0.019(3)   | 0.0136(17) | -0.0023(17) | 0.0067(16)  | 0.0039(18)  |
| O7   | 0.029(2)   | 0.014(2)   | 0.0124(19) | -0.0010(16) | 0.0037(17)  | -0.0009(17) |
| O8   | 0.024(2)   | 0.0146(19) | 0.012(2)   | -0.0007(15) | 0.0072(16)  | 0.0029(16)  |
| O9   | 0.0119(19) | 0.017(3)   | 0.046(3)   | -0.002(2)   | 0.0027(18)  | -0.0031(16) |
| O10  | 0.013(2)   | 0.014(2)   | 0.034(3)   | 0.0004(18)  | 0.0031(18)  | 0.0030(16)  |
| O11  | 0.009(2)   | 0.0126(18) | 0.037(3)   | -0.0015(18) | 0.0015(17)  | 0.0016(15)  |
| O12  | 0.0096(18) | 0.012(2)   | 0.025(2)   | 0.0017(16)  | 0.0029(16)  | -0.0015(15) |
| O13  | 0.039(3)   | 0.016(2)   | 0.015(2)   | -0.0017(17) | 0.0013(19)  | 0.0018(19)  |
| O14  | 0.041(2)   | 0.016(3)   | 0.0101(17) | 0.0036(18)  | 0.0005(17)  | 0.000(2)    |
| O15  | 0.025(2)   | 0.013(2)   | 0.0094(18) | 0.0003(15)  | 0.0025(16)  | -0.0002(16) |
| O16  | 0.030(2)   | 0.0163(19) | 0.014(2)   | -0.0007(16) | 0.0000(17)  | 0.0050(17)  |
| O17  | 0.018(2)   | 0.045(4)   | 0.023(2)   | 0.003(2)    | -0.0021(17) | 0.004(2)    |
| O19  | 0.039(3)   | 0.047(4)   | 0.085(5)   | 0.021(3)    | 0.013(3)    | -0.012(3)   |
| O20  | 0.063(4)   | 0.044(4)   | 0.037(3)   | 0.007(3)    | -0.007(3)   | 0.020(3)    |
| O21  | 0.033(3)   | 0.050(3)   | 0.032(3)   | -0.008(3)   | 0.000(2)    | 0.005(3)    |
| O22  | 0.044(3)   | 0.043(4)   | 0.069(4)   | -0.018(3)   | 0.017(3)    | 0.004(3)    |
| O23  | 0.036(3)   | 0.038(3)   | 0.077(5)   | 0.018(3)    | 0.012(3)    | -0.001(3)   |
| O24  | 0.060(4)   | 0.042(3)   | 0.033(3)   | -0.001(2)   | -0.005(3)   | -0.019(3)   |
| O25  | 0.038(3)   | 0.043(3)   | 0.057(4)   | 0.015(3)    | 0.009(3)    | 0.009(3)    |
| C1   | 0.009(2)   | 0.018(3)   | 0.018(3)   | 0.002(2)    | 0.003(2)    | -0.003(2)   |
| C2   | 0.007(2)   | 0.022(3)   | 0.014(3)   | -0.003(2)   | 0.004(2)    | -0.003(2)   |
| C3   | 0.014(3)   | 0.018(3)   | 0.011(2)   | 0.003(2)    | 0.002(2)    | -0.005(2)   |
| C4   | 0.011(2)   | 0.015(3)   | 0.009(2)   | 0.0008(19)  | -0.0002(19) | 0.0010(18)  |
| C5   | 0.013(2)   | 0.015(3)   | 0.013(3)   | 0.000(2)    | 0.005(2)    | 0.001(2)    |
| C6   | 0.008(2)   | 0.014(3)   | 0.018(3)   | -0.0022(19) | 0.001(2)    | 0.0000(19)  |
| C7   | 0.016(3)   | 0.015(3)   | 0.008(2)   | 0.0003(19)  | -0.001(2)   | -0.0007(19) |
| C8   | 0.011(2)   | 0.015(3)   | 0.013(3)   | 0.000(2)    | 0.003(2)    | 0.001(2)    |
| O18  | 0.062(4)   | 0.027(4)   | 0.058(4)   | -0.013(3)   | -0.013(3)   | 0.002(3)    |



**Figure SI4.** ORTEP plot (30% probability level) for the assymmetric unit of  $[\text{K}_2\text{CdU}(\text{C}_2\text{O}_4)_4]\cdot 9\text{H}_2\text{O}$ , SPA-2.

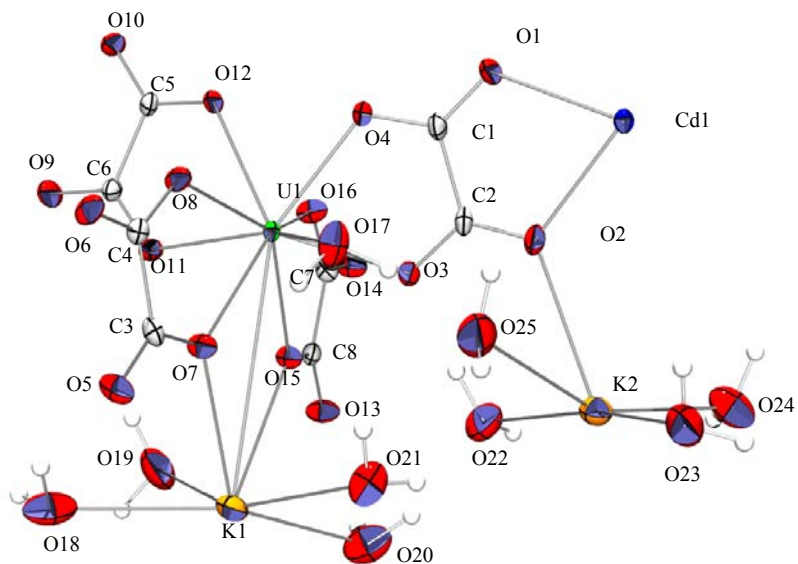

**Table SI2.** Bond lengths in Å for [K<sub>2</sub>CdU(C<sub>2</sub>O<sub>4</sub>)<sub>4</sub>];9H<sub>2</sub>O, SPA-2.

|     |                   |           |     |                   |           |
|-----|-------------------|-----------|-----|-------------------|-----------|
| U1  | -O3               | 2.402 (5) | K2  | -O25              | 2.966 (7) |
| U1  | -O4               | 2.402 (5) | K2  | -O9 <sub>d</sub>  | 2.801 (5) |
| U1  | -O7               | 2.406 (5) | K2  | -O14 <sub>e</sub> | 2.803 (6) |
| U1  | -O8               | 2.386 (5) | K2  | -O6 <sub>f</sub>  | 2.908 (5) |
| U1  | -O11              | 2.393 (5) | O1  | -C1               | 1.236 (8) |
| U1  | -O12              | 2.446 (5) | O2  | -C2               | 1.238 (7) |
| U1  | -O15              | 2.404 (5) | O3  | -C2               | 1.276 (8) |
| U1  | -O16              | 2.399 (5) | O4  | -C1               | 1.274 (7) |
| U1  | -O17              | 2.552 (5) | O5  | -C3               | 1.232 (8) |
| Cd1 | -O1               | 2.399 (5) | O6  | -C4               | 1.223 (7) |
| Cd1 | -O2               | 2.407 (5) | O7  | -C3               | 1.271 (7) |
| Cd1 | -O9 <sub>d</sub>  | 2.429 (5) | O8  | -C4               | 1.279 (7) |
| Cd1 | -O10 <sub>d</sub> | 2.359 (5) | O9  | -C6               | 1.238 (7) |
| Cd1 | -O13 <sub>g</sub> | 2.354 (5) | O10 | -C5               | 1.242 (7) |
| Cd1 | -O14 <sub>g</sub> | 2.446 (5) | O11 | -C6               | 1.278 (7) |
| Cd1 | -O5 <sub>h</sub>  | 2.378 (5) | O12 | -C5               | 1.266 (7) |
| Cd1 | -O6 <sub>h</sub>  | 2.426 (5) | O13 | -C8               | 1.243 (7) |
| K1  | -O7               | 2.890 (5) | O14 | -C7               | 1.238 (7) |
| K1  | -O15              | 2.818 (5) | O15 | -C8               | 1.269 (7) |
| K1  | -O19              | 2.848 (8) | O16 | -C7               | 1.271 (7) |
| K1  | -O20              | 2.857 (6) | O17 | -H17A             | 0.9578    |
| K1  | -O21              | 2.852 (6) | O17 | -H17B             | 0.9579    |
| K1  | -O4 <sub>b</sub>  | 2.997 (5) | O19 | -H19C             | 0.9651    |
| K1  | -O12 <sub>b</sub> | 2.827 (5) | O19 | -H19A             | 0.9589    |
| K2  | -O2               | 2.924 (5) | O20 | -H20B             | 0.9655    |
| K2  | -O22              | 2.863 (8) | O20 | -H20C             | 0.9567    |
| K2  | -O23              | 2.900 (7) | O21 | -H21B             | 0.9587    |
| K2  | -O24              | 2.823 (6) | O21 | -H21C             | 0.9627    |
| O22 | -H22C             | 0.9620    | O25 | -H25B             | 0.9612    |
| O22 | -H22A             | 0.9581    | O18 | -H18C             | 0.9613    |
| O23 | -H23B             | 0.9625    | O18 | -H18B             | 0.9584    |
| O23 | -H23A             | 0.9559    | C1  | -C2               | 1.548 (9) |
| O24 | -H24B             | 0.9627    | C3  | -C4               | 1.562 (8) |
| O24 | -H24A             | 0.9645    | C5  | -C6               | 1.536 (8) |
| O25 | -H25A             | 0.9614    | C7  | -C8               | 1.532 (8) |

**Table SI3.** Angles in ° for [K<sub>2</sub>CdU(C<sub>2</sub>O<sub>4</sub>)<sub>4</sub>];9H<sub>2</sub>O, SPA-2.

|       |      |        |             |       |      |        |             |
|-------|------|--------|-------------|-------|------|--------|-------------|
| O3    | -U1  | -O4    | 66.87 (15)  | O11   | -U1  | -O16   | 79.37 (16)  |
| O3    | -U1  | -O7    | 104.40 (15) | O11   | -U1  | -O17   | 140.31 (16) |
| O3    | -U1  | -O8    | 134.18 (16) | O12   | -U1  | -O15   | 126.61 (15) |
| O3    | -U1  | -O11   | 143.42 (15) | O12   | -U1  | -O16   | 71.42 (15)  |
| O3    | -U1  | -O12   | 129.15 (15) | O12   | -U1  | -O17   | 122.12 (17) |
| O3    | -U1  | -O15   | 69.63 (15)  | O15   | -U1  | -O16   | 66.21 (15)  |
| O3    | -U1  | -O16   | 76.55 (16)  | O15   | -U1  | -O17   | 111.21 (17) |
| O3    | -U1  | -O17   | 66.27 (15)  | O16   | -U1  | -O17   | 140.00 (15) |
| O4    | -U1  | -O7    | 143.85 (15) | O1    | -Cd1 | -O2    | 69.22 (15)  |
| O4    | -U1  | -O8    | 93.58 (15)  | O1    | -Cd1 | -O9_d  | 137.31 (15) |
| O4    | -U1  | -O11   | 134.44 (15) | O1    | -Cd1 | -O10_d | 151.69 (15) |
| O4    | -U1  | -O12   | 69.31 (15)  | O1    | -Cd1 | -O13_g | 99.11 (16)  |
| O4    | -U1  | -O15   | 129.51 (15) | O1    | -Cd1 | -O14_g | 85.78 (15)  |
| O4    | -U1  | -O16   | 79.72 (15)  | O1    | -Cd1 | -O5_h  | 79.05 (16)  |
| O4    | -U1  | -O17   | 72.72 (17)  | O1    | -Cd1 | -O6_h  | 74.80 (15)  |
| O7    | -U1  | -O8    | 66.83 (15)  | O2    | -Cd1 | -O9_d  | 70.18 (15)  |
| O7    | -U1  | -O11   | 74.08 (15)  | O2    | -Cd1 | -O10_d | 138.53 (16) |
| O7    | -U1  | -O12   | 126.28 (15) | O2    | -Cd1 | -O13_g | 73.23 (16)  |
| O7    | -U1  | -O15   | 71.39 (15)  | O2    | -Cd1 | -O14_g | 129.68 (16) |
| O7    | -U1  | -O16   | 134.21 (15) | O2    | -Cd1 | -O5_h  | 79.79 (15)  |
| O7    | -U1  | -O17   | 71.84 (17)  | O2    | -Cd1 | -O6_h  | 136.13 (16) |
| O8    | -U1  | -O11   | 79.91 (16)  | O9_d  | -Cd1 | -O10_d | 68.59 (15)  |
| O8    | -U1  | -O12   | 72.12 (15)  | O9_d  | -Cd1 | -O13_g | 81.26 (17)  |
| O8    | -U1  | -O15   | 135.88 (15) | O9_d  | -Cd1 | -O14_g | 131.59 (17) |
| O8    | -U1  | -O16   | 142.94 (15) | O5_h  | -Cd1 | -O9_d  | 81.39 (17)  |
| O8    | -U1  | -O17   | 68.43 (15)  | O6_h  | -Cd1 | -O9_d  | 131.29 (17) |
| O11   | -U1  | -O12   | 65.78 (15)  | O10_d | -Cd1 | -O13_g | 96.14 (16)  |
| O11   | -U1  | -O15   | 75.62 (15)  | O10_d | -Cd1 | -O14_g | 77.83 (15)  |
| O5_h  | -Cd1 | -O10_d | 98.24 (16)  | O4_b  | -K1  | -O12_b | 56.42 (14)  |
| O6_h  | -Cd1 | -O10_d | 77.90 (16)  | O2    | -K2  | -O22   | 70.55 (18)  |
| O13_g | -Cd1 | -O14_g | 68.48 (16)  | O2    | -K2  | -O23   | 114.86 (19) |
| O5_h  | -Cd1 | -O13_g | 151.59 (16) | O2    | -K2  | -O24   | 97.33 (17)  |
| O6_h  | -Cd1 | -O13_g | 138.06 (15) | O2    | -K2  | -O25   | 65.92 (16)  |
| O5_h  | -Cd1 | -O14_g | 138.71 (16) | O2    | -K2  | -O9_d  | 58.07 (14)  |
| O6_h  | -Cd1 | -O14_g | 69.69 (16)  | O2    | -K2  | -O14_e | 139.93 (15) |
| O5_h  | -Cd1 | -O6_h  | 69.32 (15)  | O2    | -K2  | -O6_f  | 140.44 (14) |
| O7    | -K1  | -O15   | 58.88 (14)  | O22   | -K2  | -O23   | 164.0 (2)   |
| O7    | -K1  | -O19   | 97.50 (19)  | O22   | -K2  | -O24   | 95.8 (2)    |
| O7    | -K1  | -O20   | 124.95 (18) | O22   | -K2  | -O25   | 96.5 (2)    |
| O7    | -K1  | -O21   | 74.37 (16)  | O9_d  | -K2  | -O22   | 123.7 (2)   |
| O4_b  | -K1  | -O7    | 140.05 (14) | O14_e | -K2  | -O22   | 72.01 (18)  |
| O7    | -K1  | -O12_b | 138.51 (14) | O6_f  | -K2  | -O22   | 97.16 (19)  |
| O15   | -K1  | -O19   | 69.57 (18)  | O23   | -K2  | -O24   | 98.3 (2)    |
| O15   | -K1  | -O20   | 72.81 (16)  | O23   | -K2  | -O25   | 73.73 (19)  |
| O15   | -K1  | -O21   | 80.89 (17)  | O9_d  | -K2  | -O23   | 68.55 (18)  |
| O4_b  | -K1  | -O15   | 136.17 (14) | O14_e | -K2  | -O23   | 105.06 (19) |
| O12_b | -K1  | -O15   | 145.81 (14) | O6_f  | -K2  | -O23   | 68.90 (17)  |
| O19   | -K1  | -O20   | 88.3 (2)    | O24   | -K2  | -O25   | 154.3 (2)   |
| O19   | -K1  | -O21   | 148.9 (2)   | O9_d  | -K2  | -O24   | 71.24 (18)  |
| O4_b  | -K1  | -O19   | 122.14 (19) | O14_e | -K2  | -O24   | 72.72 (17)  |
| O12_b | -K1  | -O19   | 77.96 (18)  | O6_f  | -K2  | -O24   | 121.69 (18) |
| O20   | -K1  | -O21   | 73.41 (18)  | O9_d  | -K2  | -O25   | 83.17 (17)  |
| O4_b  | -K1  | -O20   | 66.12 (16)  | O14_e | -K2  | -O25   | 132.72 (18) |
| O12_b | -K1  | -O20   | 96.34 (17)  | O6_f  | -K2  | -O25   | 78.96 (16)  |
| O4_b  | -K1  | -O21   | 73.54 (16)  | O9_d  | -K2  | -O14_e | 141.82 (16) |
| O12_b | -K1  | -O21   | 128.00 (18) | O6_f  | -K2  | -O9_d  | 136.93 (16) |

|       |      |        |             |       |      |       |             |
|-------|------|--------|-------------|-------|------|-------|-------------|
| O6_f  | -K2  | -O14_e | 58.31 (14)  | Cd1_e | -O14 | -K2_g | 117.48 (18) |
| Cd1   | -O1  | -C1    | 116.3 (4)   | U1    | -O15 | -K1   | 115.83 (18) |
| Cd1   | -O2  | -K2    | 113.98 (17) | U1    | -O15 | -C8   | 121.3 (4)   |
| Cd1   | -O2  | -C2    | 116.0 (4)   | K1    | -O15 | -C8   | 122.3 (4)   |
| K2    | -O2  | -C2    | 125.8 (4)   | U1    | -O16 | -C7   | 121.4 (4)   |
| U1    | -O3  | -C2    | 119.9 (4)   | U1    | -O17 | -H17B | 109.37      |
| U1    | -O4  | -C1    | 120.7 (4)   | H17A  | -O17 | -H17B | 109.94      |
| U1    | -O4  | -K1_c  | 114.62 (17) | U1    | -O17 | -H17A | 109.40      |
| K1_c  | -O4  | -C1    | 123.0 (4)   | H19A  | -O19 | -H19C | 109.13      |
| Cd1_f | -O5  | -C3    | 117.5 (4)   | K1    | -O19 | -H19A | 109.82      |
| Cd1_f | -O6  | -C4    | 115.9 (4)   | K1    | -O19 | -H19C | 109.51      |
| K2_h  | -O6  | -C4    | 128.2 (4)   | H20B  | -O20 | -H20C | 109.23      |
| Cd1_f | -O6  | -K2_h  | 114.35 (17) | K1    | -O20 | -H20C | 109.31      |
| U1    | -O7  | -K1_h  | 113.21 (17) | K1    | -O20 | -H20B | 108.93      |
| U1    | -O7  | -C3    | 120.9 (4)   | K1    | -O21 | -H21B | 109.71      |
| K1    | -O7  | -C3    | 125.9 (4)   | K1    | -O21 | -H21C | 109.54      |
| U1    | -O8  | -C4    | 121.7 (4)   | H21B  | -O21 | -H21C | 109.22      |
| Cd1_a | -O9  | -C6    | 116.4 (4)   | K2    | -O22 | -H22A | 108.69      |
| K2_a  | -O9  | -C6    | 125.7 (4)   | K2    | -O22 | -H22C | 108.53      |
| Cd1_a | -O9  | -K2_a  | 117.70 (18) | H22A  | -O22 | -H22C | 109.42      |
| Cd1_a | -O10 | -C5    | 119.0 (4)   | K2    | -O23 | -H23A | 109.44      |
| U1    | -O11 | -C6    | 122.6 (4)   | K2    | -O23 | -H23B | 109.12      |
| U1    | -O12 | -C5    | 120.7 (4)   | H23A  | -O23 | -H23B | 109.58      |
| U1    | -O12 | -K1_c  | 119.31 (18) | K2    | -O24 | -H24A | 109.02      |
| K1_c  | -O12 | -C5    | 120.0 (4)   | K2    | -O24 | -H24B | 109.11      |
| Cd1_e | -O13 | -C8    | 118.9 (4)   | H24A  | -O24 | -H24B | 108.86      |
| Cd1_e | -O14 | -C7    | 116.0 (4)   | H25A  | -O25 | -H25B | 109.27      |
| K2_g  | -O14 | -C7    | 125.4 (4)   | K2    | -O25 | -H25A | 109.20      |
| K2    | -O25 | -H25B  | 109.15      | O6    | -C4  | -O8   | 126.6 (5)   |
| H18B  | -O18 | -H18C  | 109.52      | O10   | -C5  | -C6   | 117.7 (5)   |
| O4    | -C1  | -C2    | 115.4 (5)   | O12   | -C5  | -C6   | 115.9 (5)   |
| O1    | -C1  | -C2    | 117.8 (5)   | O10   | -C5  | -O12  | 126.4 (5)   |
| O1    | -C1  | -O4    | 126.9 (6)   | O11   | -C6  | -C5   | 115.0 (5)   |
| O2    | -C2  | -C1    | 119.0 (5)   | O9    | -C6  | -C5   | 118.2 (5)   |
| O2    | -C2  | -O3    | 125.5 (6)   | O9    | -C6  | -O11  | 126.8 (5)   |
| O3    | -C2  | -C1    | 115.6 (5)   | O16   | -C7  | -C8   | 115.4 (5)   |
| O5    | -C3  | -C4    | 118.2 (5)   | O14   | -C7  | -C8   | 118.1 (5)   |
| O5    | -C3  | -O7    | 126.5 (6)   | O14   | -C7  | -O16  | 126.5 (5)   |
| O7    | -C3  | -C4    | 115.4 (5)   | O13   | -C8  | -O15  | 126.4 (5)   |
| O6    | -C4  | -C3    | 118.8 (5)   | O13   | -C8  | -C7   | 118.2 (5)   |
| O8    | -C4  | -C3    | 114.7 (5)   | O15   | -C8  | -C7   | 115.5 (5)   |

**Table SI4 (a).** Atomic coordinates ( $\times 10^4$ ) and equivalent isotropic and anisotropic displacement parameters ( $\text{\AA}^2 \times 10^2$ ) for  $[\text{K}_2\text{Mg}_2\text{U}_2(\text{C}_2\text{O}_4)_7] \cdot 11\text{H}_2\text{O}$ , **SPA-3**.

| Atom | x            | y           | z            | U (eq) [Ang <sup>2</sup> ] |
|------|--------------|-------------|--------------|----------------------------|
| ---- | ---          | ---         | ---          | -----                      |
| U1   | 0.80529 (1)  | 0.24889 (1) | 0.21096 (1)  | 0.0144 (1)                 |
| K1   | 0.78770 (11) | 0           | 0.43504 (13) | 0.0321 (5)                 |
| K2   | 0.93868 (9)  | 0           | 0.59105 (14) | 0.0308 (5)                 |
| Mg1  | 0.57814 (15) | 0.2090 (3)  | 0.4333 (3)   | 0.0549 (10)                |
| O1   | 0.9227 (2)   | 0.2238 (4)  | 0.2104 (3)   | 0.0265 (11)                |
| O2   | 0.8526 (2)   | 0.1387 (4)  | 0.3299 (3)   | 0.0306 (14)                |
| O3   | 0.9409 (3)   | 0.1165 (8)  | 0.4288 (5)   | 0.067 (3)                  |
| O4   | 1.0148 (2)   | 0.1617 (6)  | 0.2827 (4)   | 0.0512 (18)                |
| O5'  | 0.7128 (2)   | 0.2751 (4)  | 0.2998 (3)   | 0.0244 (10)                |
| O6   | 0.8287 (2)   | 0.3455 (4)  | 0.3480 (3)   | 0.0326 (14)                |
| O7   | 0.6701 (2)   | 0.3668 (4)  | 0.4109 (4)   | 0.0372 (16)                |
| O8   | 0.8012 (3)   | 0.3744 (5)  | 0.4912 (3)   | 0.0429 (16)                |
| O9   | 0.8320 (2)   | 0.0871 (3)  | 0.1247 (3)   | 0.0279 (11)                |
| O10  | 0.7389 (2)   | 0.0869 (3)  | 0.2412 (3)   | 0.0245 (10)                |
| O11  | 0.8735 (2)   | 0.4125 (3)  | 0.1901 (3)   | 0.0264 (10)                |
| O12  | 0.7433 (2)   | 0.4132 (3)  | 0.1694 (3)   | 0.0264 (10)                |
| O13  | 0.7101 (2)   | 0.2203 (4)  | 0.0979 (3)   | 0.0241 (10)                |
| O14  | 0.6726 (2)   | 0.2162 (4)  | -0.0498 (3)  | 0.0235 (10)                |
| O32  | 0.4613 (4)   | 0.1076 (7)  | 0.3970 (11)  | 0.120 (6)                  |
| C1   | 0.9552 (3)   | 0.1778 (5)  | 0.2761 (4)   | 0.0284 (16)                |
| C2   | 0.9141 (3)   | 0.1404 (6)  | 0.3525 (4)   | 0.0324 (17)                |
| C3   | 0.7880 (3)   | 0.3528 (5)  | 0.4095 (4)   | 0.0257 (14)                |
| C4   | 0.7166 (3)   | 0.3309 (4)  | 0.3717 (4)   | 0.0231 (12)                |
| C5   | 0.8119 (4)   | 0           | 0.1487 (5)   | 0.0200 (17)                |
| C6   | 0.7580 (3)   | 0           | 0.2158 (5)   | 0.0190 (17)                |
| C7   | 0.8460 (4)   | 1/2         | 0.1863 (5)   | 0.0194 (17)                |
| C8   | 0.7708 (4)   | 1/2         | 0.1739 (5)   | 0.0204 (17)                |
| C9   | 0.7160 (3)   | 0.2317 (4)  | 0.0138 (3)   | 0.0178 (11)                |
| O30  | 0.88900 (17) | 0.1568 (4)  | 0.8317 (3)   | 0.0287 (12)                |
| O31  | 0.8939 (8)   | 0.366 (2)   | 0.756 (2)    | 0.35 (2)                   |
| O33  | 0.9338 (3)   | 0.1243 (9)  | 0.0074 (5)   | 0.076 (3)                  |
| O34  | 0.9603 (4)   | 0.3634 (9)  | 0.0614 (7)   | 0.097 (4)                  |
| O35  | 0.88300      | 1/2         | 0.96310      | 0.29 (3)                   |
| H32A | 0.46780      | 0.03480     | 0.40710      | 0.1800                     |
| H32C | 0.43080      | 0.13190     | 0.44270      | 0.1800                     |
| H30A | 0.86690      | 0.10490     | 0.79020      | 0.0840                     |
| H30B | 0.91000      | 0.09190     | 0.84720      | 0.0360                     |
| H31A | 0.89150      | 0.40130     | 0.71400      | 0.0500                     |
| H31B | 0.85140      | 0.34170     | 0.73950      | 2.0000                     |
| H33A | 0.89450      | 0.13700     | 0.03700      | 2.0000                     |
| H33B | 0.95150      | 0.13160     | 0.06870      | 0.1640                     |
| H34A | 0.95010      | 0.34500     | 0.11360      | 0.1000                     |
| H34C | 1.00090      | 0.34810     | 0.08480      | 0.0680                     |
| H35  | 0.90940      | 0.45240     | 0.98240      | 0.0050                     |

**Table SI4(b)** (cont.): Anisotropic displacement parameters ( $\text{Å}^2 \times 10^3$ ) for  $[\text{K}_2\text{Mg}_2\text{U}_2(\text{C}_2\text{O}_4)_7] \cdot 11\text{H}_2\text{O}$ , **SPA-3**. The anisotropic displacement factor exponent takes the form:  $-2\pi^2 [h^2 a^{*2} U_{11} + \dots + 2hk a^* b^* U_{12}]$

| Atom | U(1,1) or U | U(2,2)     | U(3,3)     | U(2,3)      | U(1,3)      | U(1,2)      |
|------|-------------|------------|------------|-------------|-------------|-------------|
| U1   | 0.0135(1)   | 0.0143(1)  | 0.0152(1)  | 0.0006(1)   | 0.0008(1)   | 0.0011(1)   |
| K1   | 0.0409(10)  | 0.0330(9)  | 0.0242(8)  | 0           | 0.0147(7)   | 0           |
| K2   | 0.0236(8)   | 0.0357(9)  | 0.0323(9)  | 0           | -0.0025(6)  | 0           |
| Mg1  | 0.0347(14)  | 0.0479(17) | 0.078(2)   | 0.0126(16)  | -0.0213(14) | -0.0166(13) |
| O1   | 0.0205(18)  | 0.0291(18) | 0.030(2)   | 0.0085(17)  | 0.0032(15)  | 0.0017(16)  |
| O2   | 0.0232(19)  | 0.041(3)   | 0.028(2)   | 0.0165(19)  | 0.0045(15)  | 0.0033(18)  |
| O3   | 0.039(3)    | 0.116(7)   | 0.044(3)   | 0.040(4)    | -0.005(2)   | 0.021(4)    |
| O4   | 0.020(2)    | 0.079(4)   | 0.055(3)   | 0.018(3)    | 0.005(2)    | 0.013(3)    |
| O5'  | 0.0205(17)  | 0.0277(18) | 0.0254(18) | -0.0067(16) | 0.0049(14)  | -0.0028(15) |
| O6   | 0.0240(19)  | 0.046(3)   | 0.028(2)   | -0.0133(19) | 0.0029(15)  | -0.0043(19) |
| O7   | 0.029(2)    | 0.042(3)   | 0.042(3)   | -0.014(2)   | 0.0120(19)  | 0.003(2)    |
| O8   | 0.033(2)    | 0.068(4)   | 0.027(2)   | -0.016(2)   | -0.0020(18) | 0.003(2)    |
| O9   | 0.037(2)    | 0.0187(17) | 0.030(2)   | 0.0011(15)  | 0.0157(17)  | -0.0013(16) |
| O10  | 0.0255(18)  | 0.0170(16) | 0.032(2)   | -0.0012(14) | 0.0085(15)  | 0.0010(14)  |
| O11  | 0.0193(17)  | 0.0198(17) | 0.040(2)   | 0.0003(16)  | 0.0012(15)  | 0.0026(14)  |
| O12  | 0.0203(17)  | 0.0173(16) | 0.041(2)   | 0.0019(16)  | -0.0004(15) | -0.0026(14) |
| O13  | 0.0247(18)  | 0.0297(18) | 0.0179(16) | 0.0022(15)  | 0.0016(13)  | -0.0048(16) |
| O14  | 0.0201(16)  | 0.031(2)   | 0.0188(16) | 0.0040(15)  | -0.0016(13) | -0.0050(16) |
| O32  | 0.050(5)    | 0.054(5)   | 0.247(16)  | 0.005(7)    | -0.052(7)   | -0.004(4)   |
| C1   | 0.018(2)    | 0.034(3)   | 0.033(3)   | 0.007(2)    | 0.0009(19)  | 0.006(2)    |
| C2   | 0.028(3)    | 0.042(3)   | 0.027(3)   | 0.013(2)    | 0.001(2)    | 0.013(2)    |
| C3   | 0.024(2)    | 0.028(3)   | 0.025(2)   | -0.007(2)   | 0.0021(18)  | 0.005(2)    |
| C4   | 0.024(2)    | 0.021(2)   | 0.025(2)   | -0.0023(18) | 0.0058(18)  | 0.0015(18)  |
| C5   | 0.021(3)    | 0.020(3)   | 0.019(3)   | 0           | 0.001(2)    | 0           |
| C6   | 0.016(3)    | 0.020(3)   | 0.021(3)   | 0           | 0.001(2)    | 0           |
| C7   | 0.021(3)    | 0.017(3)   | 0.020(3)   | 0           | 0.000(2)    | 0           |
| C8   | 0.022(3)    | 0.017(3)   | 0.022(3)   | 0           | 0.000(2)    | 0           |
| C9   | 0.0162(18)  | 0.020(2)   | 0.0171(18) | 0.0024(15)  | -0.0001(14) | -0.0013(15) |
| O30  | 0.0057(13)  | 0.058(3)   | 0.0229(17) | -0.0060(18) | 0.0040(11)  | 0.0074(15)  |
| O31  | 0.082(10)   | 0.36(3)    | 0.63(5)    | -0.38(4)    | 0.116(19)   | -0.077(15)  |
| O33  | 0.041(3)    | 0.139(8)   | 0.051(4)   | 0.012(5)    | 0.023(3)    | 0.007(4)    |
| O34  | 0.078(6)    | 0.121(8)   | 0.101(7)   | 0.018(7)    | 0.060(5)    | 0.007(6)    |
| O35  | 0.26(4)     | 0.25(4)    | 0.35(6)    | 0           | 0.02(4)     | 0           |

**Figure S15.** ORTEP plot (30% probability level) for the asymmetric unit of  $[\text{K}_2\text{Mg}_2\text{U}_2(\text{C}_2\text{O}_4)_7] \cdot 11\text{H}_2\text{O}$ , **SPA-3**.

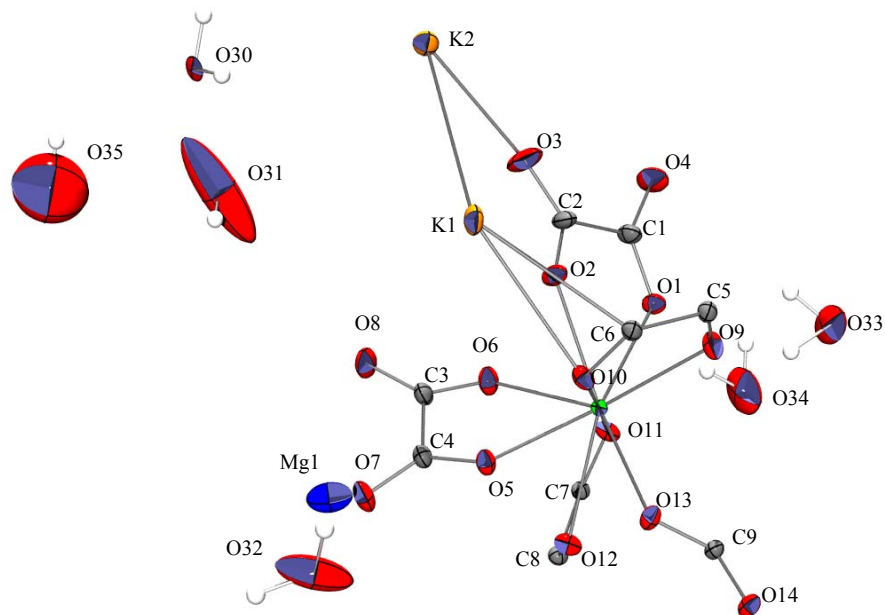

**Table SI5.** Distances in Å for [K<sub>2</sub>Mg<sub>2</sub>U<sub>2</sub>(C<sub>2</sub>O<sub>4</sub>)<sub>7</sub>];11H<sub>2</sub>O, SPA-3.

|     |        |            |     |        |            |
|-----|--------|------------|-----|--------|------------|
| U1  | -O1    | 2.422 (4)  | O2  | -C2    | 1.274 (7)  |
| U1  | -O2    | 2.386 (5)  | O3  | -C2    | 1.242 (9)  |
| U1  | -O5'   | 2.400 (4)  | O4  | -C1    | 1.232 (7)  |
| U1  | -O6    | 2.372 (5)  | O5' | -C4    | 1.269 (7)  |
| U1  | -O9    | 2.512 (4)  | O6  | -C3    | 1.275 (7)  |
| U1  | -O10   | 2.541 (4)  | O7  | -C4    | 1.237 (8)  |
| U1  | -O11   | 2.553 (4)  | O8  | -C3    | 1.235 (7)  |
| U1  | -O12   | 2.511 (4)  | O9  | -C5    | 1.251 (5)  |
| U1  | -O13   | 2.478 (4)  | O10 | -C6    | 1.248 (5)  |
| U1  | -O14_h | 2.474 (4)  | O11 | -C7    | 1.256 (5)  |
| K1  | -O2    | 2.759 (5)  | O12 | -C8    | 1.248 (5)  |
| K1  | -O2_c  | 2.759 (5)  | O13 | -C9    | 1.253 (6)  |
| K1  | -O7_f  | 2.904 (6)  | O14 | -C9    | 1.249 (7)  |
| K1  | -O8_f  | 2.715 (6)  | O32 | -H32C  | 0.9988     |
| K1  | -O7_i  | 2.904 (6)  | O32 | -H32A  | 0.9541     |
| K1  | -O8_i  | 2.715 (6)  | O30 | -H30B  | 0.9564     |
| K2  | -O3    | 2.807 (8)  | O30 | -H30A  | 0.9863     |
| K2  | -O3_a  | 2.914 (8)  | O31 | -H31A  | 0.7615     |
| K2  | -O4_a  | 2.888 (7)  | O31 | -H31B  | 0.9364     |
| K2  | -O3_b  | 2.914 (8)  | O33 | -H33A  | 0.9558     |
| K2  | -O4_b  | 2.888 (7)  | O33 | -H33B  | 0.9440     |
| K2  | -O3_c  | 2.807 (8)  | O34 | -H34C  | 0.8940     |
| K2  | -O7_f  | 2.803 (5)  | O34 | -H34A  | 0.8404     |
| K2  | -O7_i  | 2.803 (5)  | O35 | -H35_k | 0.8487     |
| Mg1 | -O7    | 2.800 (6)  | O35 | -H35   | 0.8487     |
| Mg1 | -O32   | 2.735 (9)  | C1  | -C2    | 1.527 (9)  |
| Mg1 | -O8_i  | 2.831 (7)  | C3  | -C4    | 1.545 (9)  |
| O1  | -C1    | 1.269 (8)  | C5  | -C6    | 1.531 (10) |
| C7  | -C8    | 1.533 (12) | C9  | -C9_h  | 1.550 (8)  |



**Table SI6.** Angles in ° for [K<sub>2</sub>Mg<sub>2</sub>U<sub>2</sub>(C<sub>2</sub>O<sub>4</sub>)<sub>7</sub>];11H<sub>2</sub>O, SPA-3.

|      |     |        |            |       |      |        |            |
|------|-----|--------|------------|-------|------|--------|------------|
| O1   | -U1 | -O2    | 65.09(15)  | O6    | -U1  | -O13   | 137.37(15) |
| O1   | -U1 | -O5'   | 147.50(15) | O6    | -U1  | -O14_h | 132.00(16) |
| O1   | -U1 | -O6    | 86.47(15)  | O9    | -U1  | -O10   | 63.29(13)  |
| O1   | -U1 | -O9    | 68.52(15)  | O9    | -U1  | -O11   | 118.58(13) |
| O1   | -U1 | -O10   | 115.75(15) | O9    | -U1  | -O12   | 134.34(14) |
| O1   | -U1 | -O11   | 63.81(15)  | O9    | -U1  | -O13   | 74.52(15)  |
| O1   | -U1 | -O12   | 126.31(15) | O9    | -U1  | -O14_h | 66.98(15)  |
| O1   | -U1 | -O13   | 134.74(15) | O10   | -U1  | -O11   | 176.84(14) |
| O1   | -U1 | -O14_h | 76.44(14)  | O10   | -U1  | -O12   | 117.63(13) |
| O2   | -U1 | -O5'   | 88.87(15)  | O10   | -U1  | -O13   | 65.98(15)  |
| O2   | -U1 | -O6    | 69.63(17)  | O10   | -U1  | -O14_h | 117.00(15) |
| O2   | -U1 | -O9    | 77.50(15)  | O11   | -U1  | -O12   | 63.22(13)  |
| O2   | -U1 | -O10   | 65.11(14)  | O11   | -U1  | -O13   | 116.72(15) |
| O2   | -U1 | -O11   | 112.41(15) | O11   | -U1  | -O14_h | 66.09(15)  |
| O2   | -U1 | -O12   | 147.38(15) | O12   | -U1  | -O13   | 66.96(15)  |
| O2   | -U1 | -O13   | 130.50(16) | O12   | -U1  | -O14_h | 75.17(15)  |
| O2   | -U1 | -O14_h | 135.00(15) | O13   | -U1  | -O14_h | 65.47(14)  |
| O5'  | -U1 | -O6    | 65.48(15)  | O2    | -K1  | -O2_c  | 80.40(15)  |
| O5'  | -U1 | -O9    | 126.80(15) | O2    | -K1  | -O7_f  | 133.28(15) |
| O5'  | -U1 | -O10   | 64.32(15)  | O2    | -K1  | -O8_f  | 166.05(17) |
| O5'  | -U1 | -O11   | 114.21(15) | O2    | -K1  | -O7_i  | 85.71(14)  |
| O5'  | -U1 | -O12   | 66.99(15)  | O2    | -K1  | -O8_i  | 101.75(16) |
| O5'  | -U1 | -O13   | 76.77(14)  | O2_c  | -K1  | -O7_f  | 85.71(14)  |
| O5'  | -U1 | -O14_h | 134.46(15) | O2_c  | -K1  | -O8_f  | 101.75(16) |
| O6   | -U1 | -O9    | 144.95(15) | O2_c  | -K1  | -O7_i  | 133.28(15) |
| O6   | -U1 | -O10   | 110.86(15) | O2_c  | -K1  | -O8_i  | 166.05(17) |
| O6   | -U1 | -O11   | 66.09(15)  | O7_f  | -K1  | -O8_f  | 60.63(15)  |
| O6   | -U1 | -O12   | 80.16(15)  | O7_f  | -K1  | -O7_i  | 72.18(16)  |
| O7_f | -K1 | -O8_i  | 102.08(16) | O4_b  | -K2  | -O7_i  | 131.76(16) |
| O7_i | -K1 | -O8_f  | 102.08(16) | O3_c  | -K2  | -O7_f  | 74.45(19)  |
| O8_f | -K1 | -O8_i  | 72.88(19)  | O3_c  | -K2  | -O7_i  | 112.5(2)   |
| O7_i | -K1 | -O8_i  | 60.63(15)  | O7_f  | -K2  | -O7_i  | 75.20(15)  |
| O3   | -K2 | -O3_a  | 64.7(2)    | O7    | -Mg1 | -O32   | 154.9(3)   |
| O3   | -K2 | -O4_a  | 97.5(2)    | O7    | -Mg1 | -O8_i  | 75.36(18)  |
| O3   | -K2 | -O3_b  | 96.9(2)    | O8_i  | -Mg1 | -O32   | 128.0(3)   |
| O3   | -K2 | -O4_b  | 153.7(2)   | U1    | -O1  | -C1    | 121.3(4)   |
| O3   | -K2 | -O3_c  | 64.4(3)    | U1    | -O2  | -K1    | 127.12(17) |
| O3   | -K2 | -O7_f  | 112.5(2)   | U1    | -O2  | -C2    | 120.9(4)   |
| O3   | -K2 | -O7_i  | 74.45(19)  | K1    | -O2  | -C2    | 112.0(4)   |
| O3_a | -K2 | -O4_a  | 57.08(19)  | K2    | -O3  | -C2    | 148.8(6)   |
| O3_a | -K2 | -O3_b  | 61.8(3)    | K2    | -O3  | -K2_a  | 83.1(2)    |
| O3_a | -K2 | -O4_b  | 101.2(2)   | K2_a  | -O3  | -C2    | 110.7(5)   |
| O3_a | -K2 | -O3_c  | 96.9(2)    | K2_a  | -O4  | -C1    | 116.4(5)   |
| O3_a | -K2 | -O7_f  | 170.9(2)   | U1    | -O5' | -C4    | 121.9(4)   |
| O3_a | -K2 | -O7_i  | 111.2(2)   | U1    | -O6  | -C3    | 122.3(4)   |
| O3_b | -K2 | -O4_a  | 101.2(2)   | Mg1   | -O7  | -C4    | 109.4(4)   |
| O4_a | -K2 | -O4_b  | 91.9(2)    | K1_g  | -O7  | -Mg1   | 119.8(2)   |
| O3_c | -K2 | -O4_a  | 153.7(2)   | K2_g  | -O7  | -Mg1   | 84.47(14)  |
| O4_a | -K2 | -O7_f  | 131.76(16) | K1_g  | -O7  | -C4    | 112.7(4)   |
| O4_a | -K2 | -O7_i  | 77.80(15)  | K2_g  | -O7  | -C4    | 149.4(5)   |
| O3_b | -K2 | -O4_b  | 57.08(19)  | K1_g  | -O7  | -K2_g  | 80.52(15)  |
| O3_b | -K2 | -O3_c  | 64.7(2)    | K1_g  | -O8  | -C3    | 114.5(5)   |
| O3_b | -K2 | -O7_f  | 111.2(2)   | Mg1_i | -O8  | -C3    | 114.2(5)   |
| O3_b | -K2 | -O7_i  | 170.9(2)   | K1_g  | -O8  | -Mg1_i | 131.3(2)   |
| O3_c | -K2 | -O4_b  | 97.5(2)    | U1    | -O9  | -C5    | 120.6(4)   |
| O4_b | -K2 | -O7_f  | 77.80(15)  | U1    | -O10 | -C6    | 119.8(4)   |

|      |      |        |           |       |     |        |           |
|------|------|--------|-----------|-------|-----|--------|-----------|
| U1   | -O11 | -C7    | 119.7 (4) | O6    | -C3 | -O8    | 126.4 (6) |
| U1   | -O12 | -C8    | 121.4 (4) | O5'   | -C4 | -C3    | 113.2 (5) |
| U1   | -O13 | -C9    | 120.4 (4) | O7    | -C4 | -C3    | 120.3 (5) |
| U1_h | -O14 | -C9    | 120.5 (4) | O5'   | -C4 | -O7    | 126.5 (6) |
| H32A | -O32 | -H32C  | 106.82    | O9    | -C5 | -C6    | 116.6 (4) |
| Mg1  | -O32 | -H32A  | 109.13    | O9    | -C5 | -O9_c  | 126.7 (7) |
| Mg1  | -O32 | -H32C  | 107.63    | O9_c  | -C5 | -C6    | 116.6 (4) |
| H30A | -O30 | -H30B  | 74.46     | O10   | -C6 | -C5    | 116.6 (3) |
| H31A | -O31 | -H31B  | 89.50     | O10   | -C6 | -O10_c | 126.8 (6) |
| H33A | -O33 | -H33B  | 80.00     | O10_c | -C6 | -C5    | 116.6 (3) |
| H34A | -O34 | -H34C  | 83.12     | O11   | -C7 | -C8    | 116.5 (4) |
| H35  | -O35 | -H35_k | 92.14     | O11_d | -C7 | -C8    | 116.5 (4) |
| O4   | -C1  | -C2    | 119.2 (6) | O11_d | -C7 | -O11_d | 127.0 (7) |
| O1   | -C1  | -O4    | 126.3 (6) | O12   | -C8 | -O12_d | 126.6 (7) |
| O1   | -C1  | -C2    | 114.5 (5) | O12_d | -C8 | -C7    | 116.7 (4) |
| O2   | -C2  | -C1    | 113.8 (5) | O12   | -C8 | -C7    | 116.7 (4) |
| O3   | -C2  | -C1    | 120.4 (6) | O13   | -C9 | -C9_h  | 116.6 (5) |
| O2   | -C2  | -O3    | 125.8 (6) | O14   | -C9 | -C9_h  | 117.0 (4) |
| O6   | -C3  | -C4    | 112.6 (5) | O13   | -C9 | -O14   | 126.4 (6) |
| O8   | -C3  | -C4    | 121.0 (6) |       |     |        |           |

**Table SI7 (a).** Atomic coordinates and equivalent isotropic displacement parameters ( $\text{\AA}^2 \times 10^2$ ) for  $[\text{K}_2\text{ZrMn}(\text{C}_2\text{O}_4)_4] \cdot 8\text{H}_2\text{O}$ , SPA-4.

|       |              |              |             |             |
|-------|--------------|--------------|-------------|-------------|
| Zr1   | 0.67327 (3)  | 0.56068 (3)  | 0.79184 (3) | 0.0192 (1)  |
| Mn1   | 0.76678 (10) | 0.50272 (12) | 1.06775 (9) | 0.0576 (4)  |
| O1    | 0.8406 (3)   | 0.6135 (3)   | 0.7756 (3)  | 0.0280 (9)  |
| O2    | 0.8153 (3)   | 0.4640 (3)   | 0.8831 (2)  | 0.0258 (8)  |
| O3    | 1.0369 (4)   | 0.5993 (4)   | 0.8190 (4)  | 0.0429 (13) |
| O4    | 1.0066 (3)   | 0.4181 (3)   | 0.9218 (3)  | 0.0322 (10) |
| O5    | 0.6821 (4)   | 0.7990 (3)   | 0.9962 (3)  | 0.0370 (11) |
| O6    | 0.6039 (5)   | 0.8889 (3)   | 0.8138 (3)  | 0.0463 (13) |
| O7    | 0.6360 (3)   | 0.7310 (3)   | 0.7584 (2)  | 0.0281 (9)  |
| O8    | 0.7030 (3)   | 0.6485 (3)   | 0.9238 (2)  | 0.0287 (9)  |
| O9    | 0.6415 (3)   | 0.5843 (3)   | 0.6369 (2)  | 0.0270 (9)  |
| O10   | 0.6380 (4)   | 0.4087 (3)   | 0.7215 (2)  | 0.0302 (10) |
| O11   | 0.5861 (4)   | 0.3169 (3)   | 0.5861 (3)  | 0.0377 (13) |
| O12   | 0.6314 (4)   | 0.5044 (3)   | 0.4985 (3)  | 0.0366 (11) |
| O13   | 0.3070 (5)   | 0.5092 (6)   | 0.7573 (5)  | 0.071 (2)   |
| O14   | 0.4368 (5)   | 0.3875 (6)   | 0.9075 (6)  | 0.081 (3)   |
| O15   | 0.5996 (3)   | 0.4584 (3)   | 0.8855 (3)  | 0.0274 (9)  |
| O16   | 0.4795 (3)   | 0.5748 (3)   | 0.7472 (3)  | 0.0324 (10) |
| C1    | 0.9406 (4)   | 0.5715 (4)   | 0.8213 (4)  | 0.0274 (12) |
| C2    | 0.9241 (4)   | 0.4754 (4)   | 0.8822 (3)  | 0.0238 (10) |
| C3    | 0.6751 (4)   | 0.7467 (4)   | 0.9252 (3)  | 0.0253 (11) |
| C4    | 0.6340 (4)   | 0.7963 (4)   | 0.8251 (3)  | 0.0257 (11) |
| C5    | 0.6160 (4)   | 0.3986 (4)   | 0.6310 (3)  | 0.0251 (11) |
| C6    | 0.6301 (4)   | 0.5035 (4)   | 0.5811 (3)  | 0.0258 (11) |
| C7    | 0.4158 (5)   | 0.5150 (6)   | 0.7843 (4)  | 0.0400 (16) |
| C8    | 0.4889 (5)   | 0.4475 (5)   | 0.8672 (4)  | 0.0362 (16) |
| *O24B | 0.4095 (16)  | 0.9107 (19)  | 0.0782 (14) | 0.035 (6)   |
| *O24C | 0.4003 (9)   | 0.9863 (9)   | 0.0410 (10) | 0.049 (4)   |
| O20   | 0.8260 (6)   | 0.2190 (6)   | 1.0601 (5)  | 0.074 (2)   |
| O21   | 0.3155 (8)   | 0.8062 (10)  | 0.7266 (6)  | 0.117 (4)   |
| O22   | 0.6156 (9)   | 0.3178 (9)   | 0.0813 (6)  | 0.105 (4)   |
| O23   | 0.6376 (3)   | 0.8359 (4)   | 0.1694 (3)  | 0.0434 (13) |
| *O24A | 0.5357 (8)   | 0.8880 (8)   | 0.0272 (7)  | 0.031 (3)   |
| K1    | 0.42759 (11) | 0.71203 (9)  | 0.59627 (8) | 0.0329 (3)  |
| K2    | 0.71767 (13) | 0.26285 (9)  | 0.86488 (9) | 0.0389 (3)  |

**Table SI7 (b).** Anisotropic displacement parameters ( $\text{\AA}^2$ ) for  $[\text{K}_2\text{ZrMn}(\text{C}_2\text{O}_4)_4]\cdot 8\text{H}_2\text{O}$ , SPA-4. The anisotropic displacement factor exponent takes the form:  $-2\pi^2 [h^2 a^{*2} U_{11} + \dots + 2hk a^* b^* U_{12}]$

| Atom | U(1,1)     | U(2,2)     | U(3,3)     | U(2,3)      | U(1,3)     | U(1,2)      |
|------|------------|------------|------------|-------------|------------|-------------|
| ---- | -----      | -----      | -----      | -----       | -----      | -----       |
| Zr1  | 0.0172(2)  | 0.0206(2)  | 0.0185(2)  | 0.0020(1)   | 0.0031(1)  | -0.0001(1)  |
| Mn1  | 0.0403(6)  | 0.0839(9)  | 0.0478(6)  | 0.0188(6)   | 0.0117(5)  | 0.0056(6)   |
| O1   | 0.0193(14) | 0.0289(15) | 0.0341(17) | 0.0081(13)  | 0.0048(12) | 0.0009(12)  |
| O2   | 0.0189(14) | 0.0292(15) | 0.0270(15) | 0.0055(12)  | 0.0031(11) | 0.0010(12)  |
| O3   | 0.0215(17) | 0.048(2)   | 0.058(3)   | 0.010(2)    | 0.0097(17) | -0.0040(16) |
| O4   | 0.0246(16) | 0.0325(17) | 0.0358(18) | 0.0016(14)  | 0.0027(14) | 0.0069(13)  |
| O5   | 0.047(2)   | 0.0358(19) | 0.0297(17) | -0.0071(15) | 0.0136(16) | -0.0004(17) |
| O6   | 0.069(3)   | 0.0263(18) | 0.041(2)   | 0.0009(16)  | 0.012(2)   | 0.0129(19)  |
| O7   | 0.0340(18) | 0.0243(15) | 0.0229(14) | 0.0022(11)  | 0.0031(13) | 0.0039(13)  |
| O8   | 0.0331(17) | 0.0274(16) | 0.0235(14) | 0.0037(12)  | 0.0047(12) | 0.0039(13)  |
| O9   | 0.0333(18) | 0.0250(14) | 0.0215(14) | 0.0005(11)  | 0.0058(13) | -0.0033(13) |
| O10  | 0.040(2)   | 0.0248(14) | 0.0244(15) | 0.0021(12)  | 0.0071(14) | 0.0024(14)  |
| O11  | 0.054(3)   | 0.0262(17) | 0.0310(18) | -0.0085(14) | 0.0093(17) | -0.0022(16) |
| O12  | 0.049(2)   | 0.041(2)   | 0.0219(15) | -0.0006(14) | 0.0136(15) | 0.0021(18)  |
| O13  | 0.027(2)   | 0.106(5)   | 0.078(4)   | 0.034(4)    | 0.012(2)   | 0.003(3)    |
| O14  | 0.035(3)   | 0.104(5)   | 0.110(5)   | 0.071(4)    | 0.029(3)   | 0.001(3)    |
| O15  | 0.0224(15) | 0.0323(16) | 0.0288(15) | 0.0059(13)  | 0.0093(12) | -0.0014(12) |
| O16  | 0.0192(15) | 0.044(2)   | 0.0342(18) | 0.0114(15)  | 0.0081(13) | 0.0072(14)  |
| C1   | 0.023(2)   | 0.028(2)   | 0.030(2)   | -0.0003(16) | 0.0057(16) | 0.0009(16)  |
| C2   | 0.0197(18) | 0.0246(18) | 0.0247(18) | -0.0026(15) | 0.0027(14) | 0.0025(14)  |
| C3   | 0.0232(19) | 0.0255(19) | 0.0268(19) | -0.0020(15) | 0.0068(15) | -0.0019(15) |
| C4   | 0.0222(19) | 0.0254(18) | 0.028(2)   | 0.0010(15)  | 0.0049(15) | 0.0009(15)  |
| C5   | 0.025(2)   | 0.026(2)   | 0.0223(18) | -0.0011(15) | 0.0038(15) | 0.0040(15)  |
| C6   | 0.023(2)   | 0.032(2)   | 0.0228(18) | 0.0004(15)  | 0.0075(15) | 0.0023(16)  |
| C7   | 0.024(2)   | 0.055(3)   | 0.043(3)   | 0.017(3)    | 0.013(2)   | 0.005(2)    |
| C8   | 0.027(2)   | 0.043(3)   | 0.040(3)   | 0.014(2)    | 0.012(2)   | 0.002(2)    |
| O24B | 0.024(8)   | 0.051(12)  | 0.036(9)   | -0.027(9)   | 0.017(7)   | -0.011(8)   |
| O24C | 0.029(5)   | 0.035(5)   | 0.085(9)   | -0.033(6)   | 0.022(5)   | 0.004(4)    |
| O20  | 0.063(4)   | 0.079(4)   | 0.080(4)   | -0.012(4)   | 0.021(3)   | 0.004(3)    |
| O21  | 0.104(6)   | 0.186(10)  | 0.061(4)   | -0.004(5)   | 0.024(4)   | 0.080(7)    |
| O22  | 0.101(6)   | 0.135(8)   | 0.080(5)   | -0.004(5)   | 0.029(5)   | 0.007(6)    |
| O23  | 0.0212(15) | 0.067(3)   | 0.051(2)   | -0.048(2)   | 0.0248(15) | -0.0229(17) |
| O24A | 0.027(4)   | 0.037(5)   | 0.034(4)   | -0.006(4)   | 0.015(4)   | 0.001(4)    |
| K1   | 0.0344(5)  | 0.0337(5)  | 0.0259(4)  | 0.0019(4)   | 0.0014(4)  | 0.0025(4)   |
| K2   | 0.0501(7)  | 0.0280(5)  | 0.0386(6)  | -0.0024(4)  | 0.0128(5)  | 0.0081(5)   |

**Figure S18.** ORTEP plot (30% probability level) for the assymmetric unit of  $[\text{K}_2\text{Mn}\{\text{Zr}(\text{C}_2\text{O}_4)_4\}]\cdot 8\text{H}_2\text{O}$ , SPA-4.

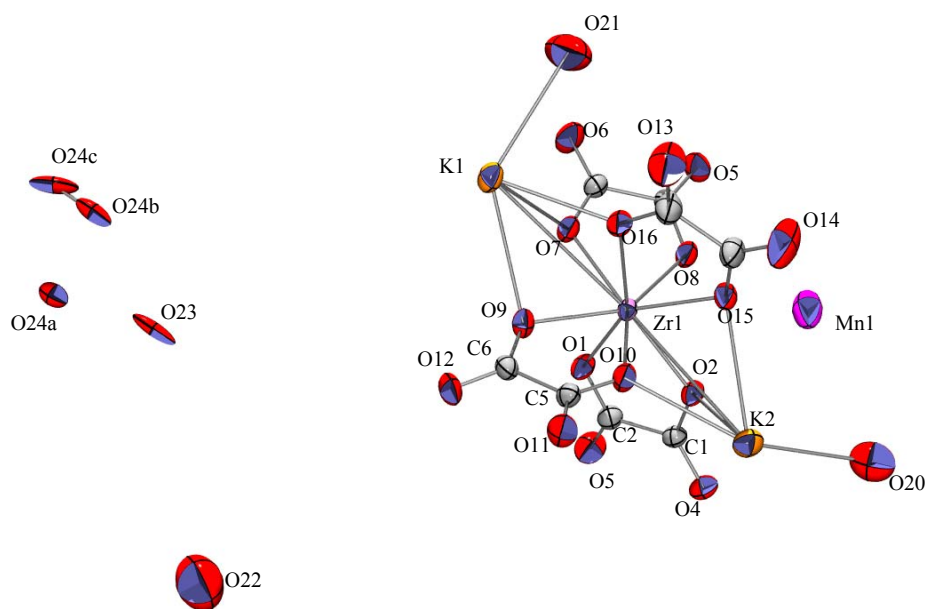

**Table SI8.** Bond Distances (Angstrom) for  $[\text{K}_2\text{ZrMn}(\text{C}_2\text{O}_4)_4]\cdot 8\text{H}_2\text{O}$ , SPA-4

|     |        |           |      |       |            |
|-----|--------|-----------|------|-------|------------|
| Zr1 | -O1    | 2.165 (4) | O4   | -C2   | 1.219 (6)  |
| Zr1 | -O2    | 2.193 (4) | O5   | -C3   | 1.218 (6)  |
| Zr1 | -O7    | 2.222 (4) | O6   | -C4   | 1.220 (6)  |
| Zr1 | -O8    | 2.173 (3) | O7   | -C4   | 1.287 (6)  |
| Zr1 | -O9    | 2.219 (3) | O8   | -C3   | 1.285 (6)  |
| Zr1 | -O10   | 2.163 (4) | O9   | -C6   | 1.292 (6)  |
| Zr1 | -O15   | 2.239 (4) | O10  | -C5   | 1.286 (5)  |
| Zr1 | -O16   | 2.200 (4) | O11  | -C5   | 1.221 (6)  |
| Mn1 | -O2    | 2.972 (4) | O12  | -C6   | 1.219 (6)  |
| Mn1 | -O8    | 2.741 (4) | O13  | -C7   | 1.234 (9)  |
| Mn1 | -O15   | 2.888 (4) | O14  | -C8   | 1.231 (10) |
| Mn1 | -O13_a | 2.948 (7) | O15  | -C8   | 1.265 (7)  |
| Mn1 | -O14_a | 2.890 (7) | O16  | -C7   | 1.293 (8)  |
| Mn1 | -O3_b  | 2.754 (6) | O24B | -O24C | 1.09 (3)   |
| Mn1 | -O4_b  | 2.821 (4) | C1   | -C2   | 1.554 (7)  |
| O1  | -C1    | 1.293 (7) | C3   | -C4   | 1.543 (6)  |
| O2  | -C2    | 1.298 (6) | C5   | -C6   | 1.547 (7)  |
| O3  | -C1    | 1.201 (7) | C7   | -C8   | 1.533 (9)  |

**Table SI9.** Angles (degrees) for  $[\text{K}_2\text{ZrMn}(\text{C}_2\text{O}_4)_4]\cdot 8\text{H}_2\text{O}$ , SPA-4.

|       |      |      |             |       |      |        |             |
|-------|------|------|-------------|-------|------|--------|-------------|
| O1    | -Zr1 | -O2  | 71.13 (14)  | O2    | -Mn1 | -O8    | 59.21 (10)  |
| O1    | -Zr1 | -O7  | 78.84 (14)  | O2    | -Mn1 | -O15   | 51.80 (10)  |
| O1    | -Zr1 | -O8  | 91.35 (15)  | O2    | -Mn1 | -O13_a | 166.37 (17) |
| O1    | -Zr1 | -O9  | 74.62 (15)  | O2    | -Mn1 | -O14_a | 125.52 (19) |
| O1    | -Zr1 | -O10 | 106.08 (16) | O2    | -Mn1 | -O3_b  | 97.13 (14)  |
| O1    | -Zr1 | -O15 | 140.83 (15) | O2    | -Mn1 | -O4_b  | 71.20 (11)  |
| O1    | -Zr1 | -O16 | 147.96 (15) | O8    | -Mn1 | -O15   | 56.77 (11)  |
| O2    | -Zr1 | -O7  | 137.92 (13) | O8    | -Mn1 | -O13_a | 128.53 (17) |
| O2    | -Zr1 | -O8  | 80.80 (13)  | O8    | -Mn1 | -O14_a | 73.82 (18)  |
| O2    | -Zr1 | -O9  | 125.15 (13) | O3_b  | -Mn1 | -O8    | 140.97 (14) |
| O2    | -Zr1 | -O10 | 78.83 (14)  | O4_b  | -Mn1 | -O8    | 81.33 (12)  |
| O2    | -Zr1 | -O15 | 70.58 (14)  | O13_a | -Mn1 | -O15   | 120.26 (16) |
| O2    | -Zr1 | -O16 | 140.79 (14) | O14_a | -Mn1 | -O15   | 80.68 (18)  |
| O7    | -Zr1 | -O8  | 70.98 (12)  | O3_b  | -Mn1 | -O15   | 134.56 (14) |
| O7    | -Zr1 | -O9  | 71.26 (12)  | O4_b  | -Mn1 | -O15   | 120.26 (12) |
| O7    | -Zr1 | -O10 | 139.00 (12) | O13_a | -Mn1 | -O14_a | 56.5 (2)    |
| O7    | -Zr1 | -O15 | 127.38 (13) | O3_b  | -Mn1 | -O13_a | 81.87 (18)  |
| O7    | -Zr1 | -O16 | 74.50 (14)  | O4_b  | -Mn1 | -O13_a | 119.06 (16) |
| O8    | -Zr1 | -O9  | 141.57 (14) | O3_b  | -Mn1 | -O14_a | 137.3 (2)   |
| O8    | -Zr1 | -O10 | 147.01 (13) | O4_b  | -Mn1 | -O14_a | 129.42 (17) |
| O8    | -Zr1 | -O15 | 74.76 (14)  | O3_b  | -Mn1 | -O4_b  | 60.79 (14)  |
| O8    | -Zr1 | -O16 | 96.38 (14)  | Zr1   | -O1  | -C1    | 122.9 (3)   |
| O9    | -Zr1 | -O10 | 71.12 (13)  | Zr1   | -O2  | -Mn1   | 98.72 (13)  |
| O9    | -Zr1 | -O15 | 136.72 (14) | Zr1   | -O2  | -C2    | 121.2 (3)   |
| O9    | -Zr1 | -O16 | 80.19 (14)  | Mn1   | -O2  | -C2    | 116.4 (3)   |
| O10   | -Zr1 | -O15 | 74.12 (14)  | Mn1_b | -O3  | -C1    | 119.1 (4)   |
| O10   | -Zr1 | -O16 | 83.62 (16)  | Mn1_b | -O4  | -C2    | 115.6 (3)   |
| O15   | -Zr1 | -O16 | 70.98 (15)  | Zr1   | -O7  | -C4    | 119.9 (3)   |
| Zr1   | -O8  | -Mn1 | 106.49 (15) | O5    | -C3  | -C4    | 121.5 (5)   |
| Zr1   | -O8  | -C3  | 122.1 (3)   | O8    | -C3  | -C4    | 112.8 (4)   |
| Mn1   | -O8  | -C3  | 130.6 (3)   | O6    | -C4  | -O7    | 125.4 (4)   |
| Zr1   | -O9  | -C6  | 120.1 (3)   | O6    | -C4  | -C3    | 121.2 (4)   |
| Zr1   | -O10 | -C5  | 122.4 (3)   | O7    | -C4  | -C3    | 113.4 (4)   |
| Mn1_a | -O13 | -C7  | 105.4 (5)   | O10   | -C5  | -O11   | 125.7 (5)   |
| Mn1_a | -O14 | -C8  | 108.4 (5)   | O10   | -C5  | -C6    | 112.9 (4)   |
| Zr1   | -O15 | -Mn1 | 100.09 (14) | O11   | -C5  | -C6    | 121.4 (4)   |
| Zr1   | -O15 | -C8  | 119.6 (4)   | O9    | -C6  | -O12   | 126.6 (5)   |
| Mn1   | -O15 | -C8  | 127.4 (4)   | O9    | -C6  | -C5    | 112.4 (4)   |
| Zr1   | -O16 | -C7  | 120.6 (4)   | O12   | -C6  | -C5    | 121.0 (4)   |
| O1    | -C1  | -O3  | 126.7 (5)   | O13   | -C7  | -O16   | 125.4 (6)   |
| O1    | -C1  | -C2  | 111.8 (4)   | O13   | -C7  | -C8    | 121.3 (6)   |
| O3    | -C1  | -C2  | 121.5 (5)   | O16   | -C7  | -C8    | 113.4 (5)   |
| O2    | -C2  | -O4  | 126.0 (5)   | O14   | -C8  | -O15   | 126.5 (6)   |
| O2    | -C2  | -C1  | 112.5 (4)   | O14   | -C8  | -C7    | 118.7 (6)   |
| O4    | -C2  | -C1  | 121.5 (4)   | O15   | -C8  | -C7    | 114.8 (5)   |
| O5    | -C3  | -O8  | 125.7 (4)   |       |      |        |             |
